# Supplementary material
Source: publisher figshare collection journal article supplement (https://acs.figshare.com/ndownloader/files/14671529)
Supplement: Supplementary file 1 [file 14671529]

Supporting Information for:

## Ultrafast and Ultrasensitive Naked-Eye Detection of Urease-Positive Bacteria with Plasmonic Nanosensors

Giulia Santopolo,<sup>2</sup> Antonio Doménech-Sánchez,<sup>3,4</sup> Steven M. Russell,<sup>1,2</sup> and Roberto de la Rica<sup>1,2\*</sup>

<sup>1</sup>Multidisciplinary Sepsis Group, Balearic Islands Health Research Institute (IdISBa), S Building, Son Espases Hospital, 07120, Spain.

<sup>2</sup>Department of Chemistry, University of the Balearic Islands, 07122 Palma de Mallorca, Illes Balears Spain.

<sup>3</sup>Área de Microbiología e Instituto Universitario de Investigación en Ciencias de la Salud (IUNICS), University of the Balearic Islands, 07122 Palma de Mallorca, Illes Balears Spain.

<sup>4</sup>Saniconsult Ibérica S.L., 07009 Palma de Mallorca, Illes Balears Spain

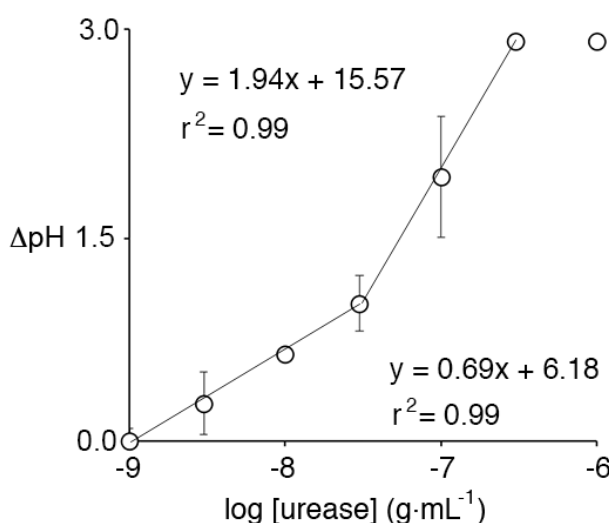

**Figure S1.** Calibration plot showing the variation of pH produced by urease solutions at different concentrations in the presence of 0.1 M urea (1 mL, 30 min reaction time). Variations in the pH of the solution were measured with pH meter (pH 8+ DHS, XS Instruments). The plot shows two linear regions, one between  $\Delta\text{pH}$  0 and 1 and another one between 1 and 3. The concentration of urease bound to magnetic beads was determined by interpolating pH variations in this calibration plot and calculating the % recovery with respect to the initial urease concentration added to the solution containing PDPA-beads.

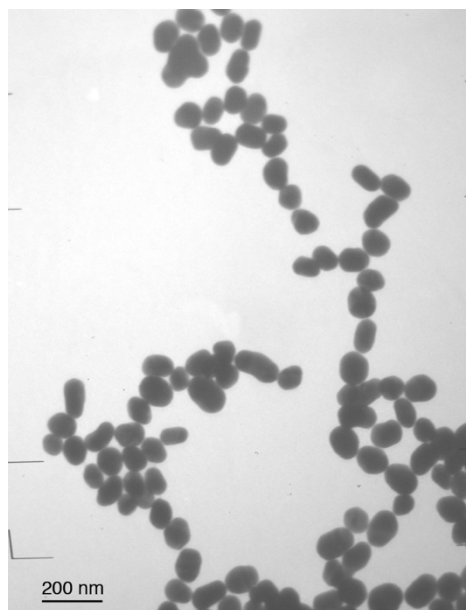

**Figure S2.** Representative TEM image of gold nanoparticles after adding  $1 \mu\text{g mL}^{-1}$  BSA in deionized water. The assemblies show a mixture of chain-like morphologies and undefined aggregates. The average size was obtained by measuring 100 nanoparticles.

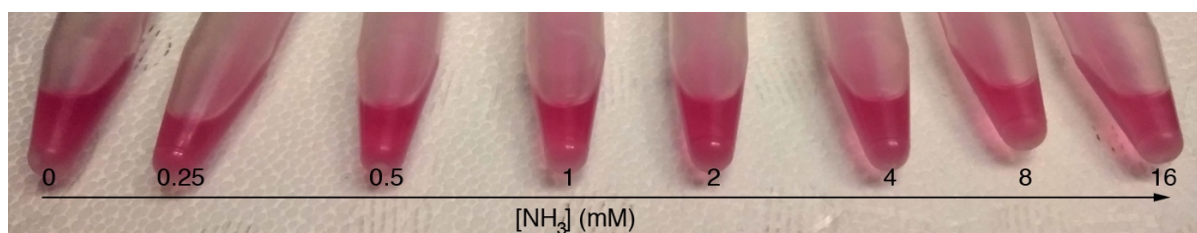

**Figure S3.** Photographs of nanoparticle dispersions after adding  $\text{NH}_3$  at different concentrations. The nanoparticle dispersions did not change color even when  $\text{NH}_3$  was added at a much higher concentration than in Figure 2, which demonstrates that, in the proposed concentration range,  $\text{NH}_3$  fine-tunes the BSA-induced aggregation of gold nanoparticles but cannot trigger the assembly of the colloids on its own.

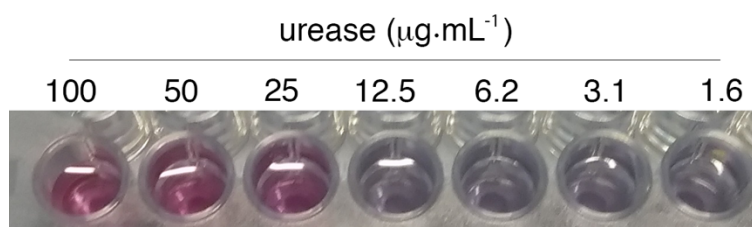

**Figure S4.** Detection of urease activity with plasmonic nanosensors in the absence of PDDA.  $100 \mu\text{L}$  of urease in phosphate buffer was added to each well of a Nunc MaxiSorp plate. After 1 h the plates were washed 3 times with PBS. Then,  $100 \mu\text{L}$  of  $0.1 \text{ M}$  urea containing  $1 \mu\text{g/mL}$  BSA was added in each well. The photograph was taken after 30 minutes.

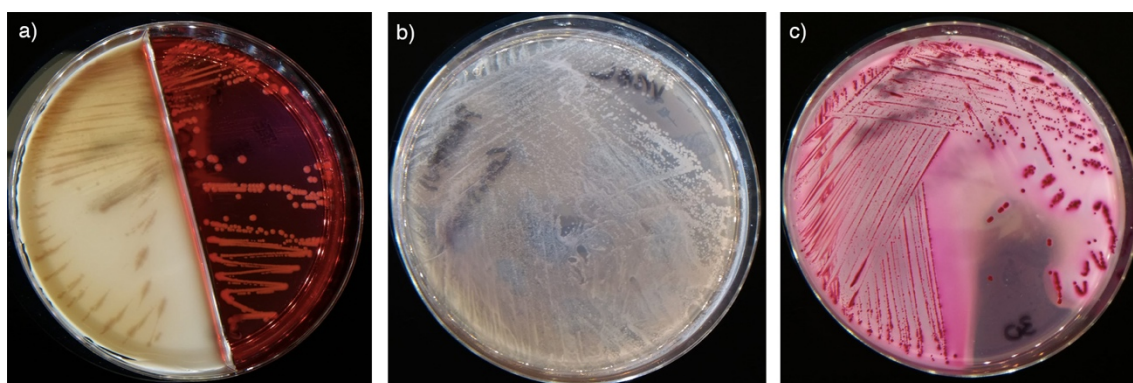

**Figure S5.** To demonstrate that PDDA-covered magnetic beads can capture *P. mirabilis*, 10  $\mu\text{L}$  of the colloids were added to 1 mL of a bacteria solution containing  $10^8$  cells  $\text{mL}^{-1}$ . After washing twice with water, the beads were resuspended in 1 mL of phosphate buffer. The presence of *P. mirabilis* in the sample was demonstrated by plating the beads onto XLD (panel a, red medium on the right), VRBL (panel b) and VRBG (panel c) plates, and then incubating at 37 °C for 24 h. In panel (a) *P. mirabilis* grows as yellow, opaque colonies without black center; in panel (b) *P. mirabilis* grows as not fermenting straw colonies; and in panel (c) *P. mirabilis* grows as fermenting purple-pink colonies.

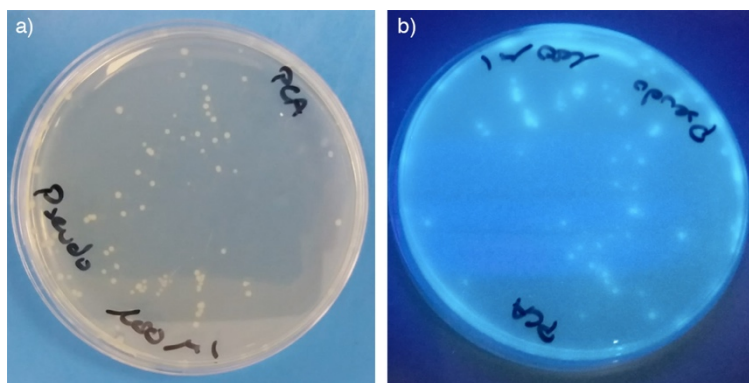

**Figure S6.** To demonstrate that PDDA-covered magnetic beads can capture *P. aeruginosa*, 10  $\mu\text{L}$  of the colloids were added to 1 mL of a bacteria solution containing  $10^8$  cells  $\text{mL}^{-1}$ . After washing twice with water, the beads were resuspended in 1 mL of phosphate buffer. The presence of *P. aeruginosa* in the sample was demonstrated by plating the beads onto PCA media, an incubating at 37 °C for 24 h. Fluoresce emission was further detected after exposure to 365 nm-UV light.

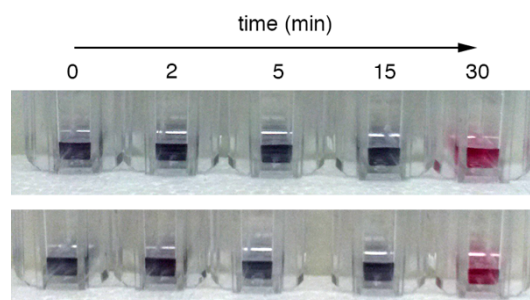

**Figure S7.** Additional experiments showing the detection of  $10^1$  cells  $\text{mL}^{-1}$  *P. mirabilis* with a urea incubation time of 30 min (red-colored solutions).

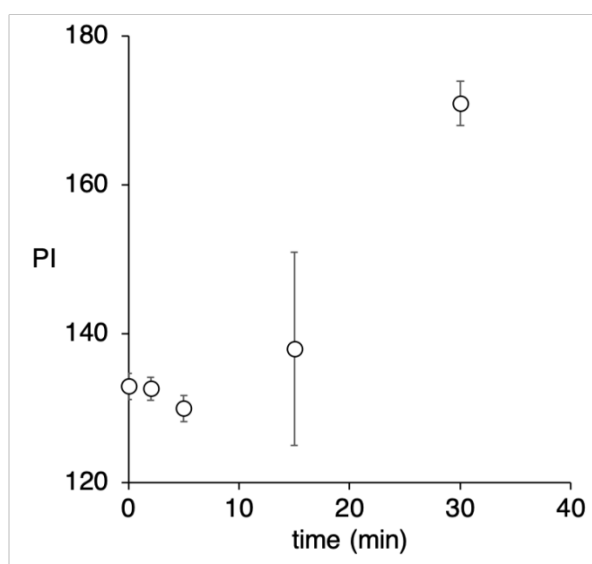

**Figure S8.** Pixel intensity of the “a” channel in the  $L^*a^*b^*$  color space obtained from the photographs of experiments for the detection of  $10^1$  cells  $\cdot \text{mL}^{-1}$  *Proteus mirabilis* (Figure S7 and Figure 7, row PM = 0, PM =  $10^1$ ). In this Figure, samples yield a signal higher than 2 times de standard deviation of the blank only when the signal generation step is performed for 30 min. Error bars are the standard deviation of the 3 independent experiments.

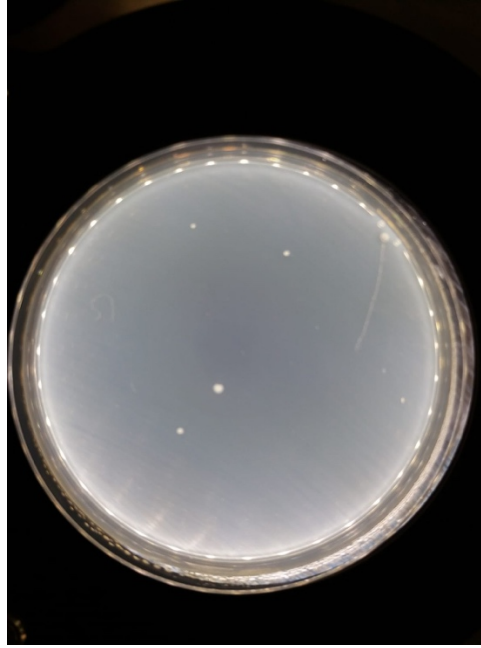

**Figure S9.** Representative image of a plate after culturing  $10^1$  cells/mL.

| cfu·mL <sup>-1</sup> | time (h) → |   |     |     |     |     |    |    |    |
|----------------------|------------|---|-----|-----|-----|-----|----|----|----|
|                      | 0.5        | 1 | 2   | 4   | 7   | 9   | 24 | 30 | 48 |
| $5 \cdot 10^9$       | -          | + | +   | +   | +   | +   | +  | +  | +  |
| $5 \cdot 10^8$       | -          | - | +   | +   | +   | +   | +  | +  | +  |
| $5 \cdot 10^7$       | -          | - | +/- | +   | +   | +   | +  | +  | +  |
| $5 \cdot 10^6$       | -          | - | -   | +   | +   | +   | +  | +  | +  |
| $5 \cdot 10^5$       | -          | - | -   | +/- | +   | +   | +  | +  | +  |
| $5 \cdot 10^4$       | -          | - | -   | -   | +   | +   | +  | +  | +  |
| $5 \cdot 10^3$       | -          | - | -   | -   | +/- | +   | +  | +  | +  |
| $5 \cdot 10^2$       | -          | - | -   | -   | -   | +/- | +  | +  | +  |
| $5 \cdot 10^1$       | -          | - | -   | -   | -   | -   | +  | +  | +  |
| 0                    | -          | - | -   | -   | -   | -   | -  | -  | -  |

**Figure S10.** Detection of *P. mirabilis* at different initial concentrations with urea broth incubated at 37°C for different times. Urease-positive solutions were detected by visual inspection (pink color).
